# Supplementary material
Source: PubMed Central journal article supplement (PMC3910361)
Supplement: 97320630091036S1.pdf [file 97320630091036S1.pdf]

## Supplementary material:

**Table 1:** WRKY transcription factor family (BrWRKY & BnWRKY) genes showing interaction with BjMPK3P

| S.NO | WRKY ( <i>Brassica rapa</i> ) | Phosphorylated (Global Energies) |
|------|-------------------------------|----------------------------------|
| 1.   | Wrky 1                        | -51.51                           |
| 2.   | Wrky 2                        | -                                |
| 3.   | Wrky 3                        | -                                |
| 4.   | Wrky4                         | -                                |
| 5.   | Wrky5                         | <b>-12.17</b>                    |
| 6.   | Wrky6                         | -                                |
| 7.   | Wrky7                         | -23.52                           |
| 8.   | Wrky8                         | -53.29                           |
| 9.   | Wrky9                         | -73.56                           |
| 10.  | Wrky10                        | -13.40                           |
| 11.  | Wrky11                        | -31.78                           |
| 12.  | Wrky12                        | -13.37                           |
| 13.  | Wrky13                        | -                                |
| 14.  | Wrky14                        | -                                |
| 15.  | Wrky15                        | -22.73                           |
| 16.  | Wrky16                        | -23.31                           |
| 17.  | Wrky17                        | -46.57                           |
| 18.  | Wrky18                        | -55.50                           |
| 19.  | Wrky19                        | -54.64                           |
| 20.  | Wrky20                        | -23.81                           |
| 21.  | Wrky21                        | -32.56                           |
| 22.  | Wrky22                        | -43.47                           |
| 23.  | Wrky23                        | -30.74                           |
| 24.  | Wrky24                        | -                                |
| 25.  | Wrky25                        | -53.69                           |
| 26.  | Wrky26                        | -30.79                           |
| 27.  | Wrky27                        | -34.54                           |
| 28.  | Wrky28                        | -21.98                           |
| 29.  | Wrky29                        | -40.65                           |
| 30.  | Wrky30                        | -28.23                           |
| 31.  | Wrky31                        | -15.80                           |
| 32.  | Wrky32                        | -43.31                           |
| 33.  | Wrky33                        | -                                |
| 34.  | Wrky34                        | -22.53                           |
| 35.  | Wrky35                        | -17.07                           |
| 36.  | Wrky36                        | -                                |
| 37.  | Wrky37                        | -23.99                           |
| 38.  | Wrky38                        | -15.71                           |
| 39.  | Wrky39                        | -29.96                           |
| 40.  | Wrky40                        | -23.05                           |
| 41.  | Wrky41                        | -14.89                           |
| 42.  | Wrky42                        | -13.97                           |
| 43.  | Wrky43                        | -46.67                           |
| 44.  | Wrky44                        | -41.74                           |
| 45.  | Wrky45                        | -46.21                           |
| 46.  | Wrky46                        | -44.16                           |
| 47.  | Wrky47                        | -24.72                           |
| 48.  | Wrky48                        | -11.35                           |
| 49.  | Wrky49                        | -33.84                           |
| 50.  | Wrky50                        | -62.36                           |
| 51.  | Wrky51                        | -35.57                           |
| 52.  | Wrky52                        | -36.61                           |
| 53.  | Wrky53                        | -40.26                           |
| 54.  | Wrky54                        | -32.76                           |
| 55.  | Wrky55                        | -7.49                            |
| 56.  | Wrky56                        | -13.62                           |
| 57.  | Wrky57                        | -25.99                           |
| 58.  | Wrky58                        | -35.86                           |
| 59.  | Wrky59                        | -21.73                           |
| 60.  | Wrky60                        | -36.42                           |
| 61.  | Wrky61                        | -38.19                           |
| 62.  | Wrky62                        | -30.26                           |
| 63.  | Wrky63                        | -27.56                           |

|     |        |        |
|-----|--------|--------|
| 64. | Wrky64 | -31.99 |
| 65. | Wrky65 | -1.10  |
| 66. | Wrky66 | -50.85 |
| 67. | Wrky67 | -55.00 |
| 68. | Wrky68 | -38.03 |
| 69. | Wrky69 | -25.81 |
| 70. | Wrky70 | -25.52 |
| 71. | Wrky71 | -39.36 |
| 72. | Wrky72 | -16.52 |
| 73. | Wrky73 | -      |
| 74. | Wrky74 | -      |
| 75. | Wrky75 | -      |

\*(-) Sequence not available in BRAD. Some are annotated but does not possess the WRKY domain.

**Table 2:** List of potential interacting WRKY transcription factors identified through both minimal sequence motif search and docking approach.

MPK3P (*Brassica juncea*)

| S.NO | WRKY ( <i>Brassica napus</i> ) | Phosphorylated (Global Energies) |
|------|--------------------------------|----------------------------------|
| 1.   | Wrky 1                         | -                                |
| 2.   | Wrky 2                         | -3.18                            |
| 3.   | Wrky 3                         | -17.78                           |
| 4.   | Wrky4                          | -28.41                           |
| 5.   | Wrky5                          | -                                |
| 6.   | Wrky6                          | -39.72                           |
| 7.   | Wrky7                          | -39.43                           |
| 8.   | Wrky8                          | -36.40                           |
| 9.   | Wrky9                          | -                                |
| 10.  | Wrky10                         | -                                |
| 11.  | Wrky11                         | -39.41                           |
| 12.  | Wrky12                         | -                                |
| 13.  | Wrky13                         | -                                |
| 14.  | Wrky14                         | -                                |
| 15.  | Wrky15                         | -36.06                           |
| 16.  | Wrky16                         | -                                |
| 17.  | Wrky17                         | -45.63                           |
| 18.  | Wrky18                         | -32.92                           |
| 19.  | Wrky19                         | -                                |
| 20.  | Wrky20                         | -31.09                           |
| 21.  | Wrky21                         | -21.87                           |
| 22.  | Wrky22                         | -25.34                           |
| 23.  | Wrky23                         | -                                |
| 24.  | Wrky24                         | -14.15                           |
| 25.  | Wrky25                         | -10.21                           |
| 26.  | Wrky26                         | -20.94                           |
| 27.  | Wrky27                         | -45.22                           |
| 28.  | Wrky28                         | -29.34                           |
| 29.  | Wrky29                         | -31.82                           |
| 30.  | Wrky30                         | -                                |
| 31.  | Wrky31                         | -                                |
| 32.  | Wrky32                         | -29.08                           |
| 33.  | Wrky33                         | -31.79                           |
| 34.  | Wrky34                         | -                                |
| 35.  | Wrky35                         | -26.81                           |
| 36.  | Wrky36                         | -6.85                            |
| 37.  | Wrky37                         | -                                |
| 38.  | Wrky38                         | -                                |
| 39.  | Wrky39                         | -16.79                           |
| 40.  | Wrky40                         | -39.69                           |
| 41.  | Wrky41                         | -                                |
| 42.  | Wrky42                         | 6.69                             |
| 43.  | Wrky43                         | -                                |
| 44.  | Wrky44                         | -38.39                           |
| 45.  | Wrky45                         | -50.87                           |
| 46.  | Wrky46                         | -28.45                           |
| 47.  | Wrky47                         | -                                |
| 48.  | Wrky48                         | -                                |
| 49.  | Wrky49                         | -                                |
| 50.  | Wrky50                         | -24.41                           |
| 51.  | Wrky51                         | -                                |

|     |        |        |
|-----|--------|--------|
| 52. | Wrky52 | -      |
| 53. | Wrky53 | -32.93 |
| 54. | Wrky54 | -      |
| 55. | Wrky55 | -      |
| 56. | Wrky56 | -      |
| 57. | Wrky57 | -      |
| 58. | Wrky58 | -      |
| 59. | Wrky59 | -      |
| 60. | Wrky60 | -      |
| 61. | Wrky61 | -      |
| 62. | Wrky62 | -      |
| 63. | Wrky63 | -      |
| 64. | Wrky64 | -      |
| 65. | Wrky65 | -14.43 |
| 66. | Wrky66 | -      |
| 67. | Wrky67 | -      |
| 68. | Wrky68 | -      |
| 69. | Wrky69 | -20.53 |
| 70. | Wrky70 | -22.37 |
| 71. | Wrky71 | -      |
| 72. | Wrky72 | -27.33 |
| 73. | Wrky73 | -      |
| 74. | Wrky74 | -33.78 |
| 75. | Wrky75 | -24.64 |

---

\*(-) Sequence not available in Brassica genome gateway
